# Supplementary material
Source: HighWire-hosted journal article supplement (https://bmjopen.bmj.com/content/11/3/e045163)
Supplement: inline-supplementary-material-3 [file inline-supplementary-material-3.pdf]

## Appendix A

### Baseline Survey

*The questionnaire will be read out on phone and completed by the Guddi Bajis, on behalf of the participants*

Province/City: \_\_\_\_\_

District: \_\_\_\_\_

Guddi Bajis Code: \_\_\_\_\_

Participant Code: \_\_\_\_\_

#### **SECTION A:**

#### **SOCIO-DEMOGRAPHIC CHARACTERISTICS**

|                                    |                 |                     |                            |                        | <b>Coding</b> |
|------------------------------------|-----------------|---------------------|----------------------------|------------------------|---------------|
| Q1. Age                            |                 |                     |                            |                        |               |
| Q2. Religion                       | 1.Muslim        | 2.Christian         | 3.Hindu                    | 4.Other                |               |
| Q3. Marital status                 | 1.Never married | 2.Currently married | 3.Seperated/divorced       | 4.Widow/widower        |               |
| Q4. Present place of living        | 1.Urban         | 2.Semi-urban        | 3.Rural                    |                        |               |
| Q5. Highest education              | 1.Illiterate    | 2.Primary           | 3.High school or Secondary | 3.Graduation and above |               |
| Q6. Housing type                   | 1.Kutchha       | 2.Pucca             | 3.Semi-pucca               | Other (specify)        |               |
| Q7. House Ownership                | Owned           | Rented              | Living with Someone        | Other (specify)        |               |
| Q8. Occupation                     | 1.Unemployed    | 2.Employed          |                            |                        |               |
| Q9. What is your monthly income    |                 |                     |                            |                        |               |
| Q10. Spouse literacy               | 1.Illiterate    | 2.Primary           | 3.High school or secondary | 4. Graduation or above |               |
| Q11. Spouse occupation             | 1.Unemployed    | 2.Employed          | 3.Type of employment       |                        |               |
| Q12. How many children do you have |                 |                     |                            |                        |               |
| Q13. What is the age of your last  |                 |                     |                            |                        |               |

|                                       |  |  |
|---------------------------------------|--|--|
| child                                 |  |  |
| Q14. Number of people living in house |  |  |

|                                                                                           |      |                         |              |
|-------------------------------------------------------------------------------------------|------|-------------------------|--------------|
| Q15. Number of rooms in house                                                             |      |                         |              |
| Q16. Are you currently taking care of a disabled/ dependent family member                 | 1.No | 2.Yes                   | If Yes, who: |
| Q17. Do you have the following in your house: (tick all that apply)                       |      |                         |              |
| TV                                                                                        |      |                         |              |
| Radio                                                                                     |      |                         |              |
| Landline                                                                                  |      |                         |              |
| Electricity at least 8 hours in a day                                                     |      |                         |              |
| Mobile phone with internet                                                                |      |                         |              |
| Washing machine                                                                           |      |                         |              |
| Toile facility in house with flush                                                        |      | If not, what do you use |              |
| Drinking water from tap                                                                   |      | If not, what do you use |              |
| Gutter drainage                                                                           |      | If not, what do you use |              |
| Stove for cooking with gas connection                                                     |      | If not, what do you use |              |
| Garbage collectors come to dispose garbage                                                |      | If not, what do you use |              |
| Q18. Are you taking any health insurance (please describe scheme/ installment/ coverage)? |      |                         |              |
| Q19. Do you have any savings?                                                             |      |                         |              |

|                                                                                                                             |  |  |
|-----------------------------------------------------------------------------------------------------------------------------|--|--|
| (Approximately how much?)                                                                                                   |  |  |
| Q20. Have you taken a loan?<br>(From where, what is the duration, what is the amount, how much installment are you paying?) |  |  |

|                                                                                                                        |      |       |                                            |               |
|------------------------------------------------------------------------------------------------------------------------|------|-------|--------------------------------------------|---------------|
| Q21. During the past 12 months have you been admitted to hospital for any diseases or health problem?                  | 1.No | 2.Yes | 3. If yes, can you describe health problem | <b>Coding</b> |
| Q22. Beside the hospitalization in past 12 months, how many times you have visited a public hospital for consultation? |      |       |                                            |               |
| Q23. How many times in a month do you visit or are visited by your community healthcare provider?                      |      |       |                                            |               |
| Q24. How many different types of medicine/drugs are you taking at present?                                             |      |       |                                            |               |

**SECTION B:****MULTIMORBIDITY ASSESSMENT QUESTIONNAIRE FOR PRIMARY CARE (MAQ-PC)**

|                                                                      |     |    |               |
|----------------------------------------------------------------------|-----|----|---------------|
| Q25. Please provide information about the following chronic diseases | Yes | No | <b>Coding</b> |
| Arthritis                                                            |     |    |               |
| Diabetes                                                             |     |    |               |
| Hypertension                                                         |     |    |               |
| Chronic lungs diseases<br>(including Asthma)                         |     |    |               |

|                                                                                 |                                                                                                |    |                         |  |
|---------------------------------------------------------------------------------|------------------------------------------------------------------------------------------------|----|-------------------------|--|
| Acid Peptic diseases                                                            |                                                                                                |    |                         |  |
| Chronic back ache                                                               |                                                                                                |    |                         |  |
| Heart disease                                                                   |                                                                                                |    |                         |  |
| Stroke                                                                          |                                                                                                |    |                         |  |
| Blindness                                                                       |                                                                                                |    |                         |  |
| Deafness                                                                        |                                                                                                |    |                         |  |
| Dementia                                                                        |                                                                                                |    |                         |  |
| Alcohol disorder                                                                |                                                                                                |    |                         |  |
| Cancer                                                                          |                                                                                                |    |                         |  |
| Chronic kidney disease                                                          |                                                                                                |    |                         |  |
| Epilepsy                                                                        |                                                                                                |    |                         |  |
| Thyroid disease                                                                 |                                                                                                |    |                         |  |
| Tuberculosis                                                                    |                                                                                                |    |                         |  |
| Filariasis                                                                      |                                                                                                |    |                         |  |
| Corona Virus Questions                                                          |                                                                                                |    |                         |  |
| Q26. Are you aware of the Corona Virus symptoms?                                | Yes                                                                                            | No |                         |  |
| Q27. Have you or any of your family members experienced any of the following in | Acute respiratory distress syndrome ____<br>Cough ____<br>Conjunctivitis ____<br>Diarrhea ____ |    | Identify the HH members |  |

|                                                                           |                                                                                                                                                                    |  |  |  |
|---------------------------------------------------------------------------|--------------------------------------------------------------------------------------------------------------------------------------------------------------------|--|--|--|
| the past 8 months?<br>(please tick all that apply)                        | Fatigue____<br>Fever ____<br>Chills ____<br>Headache ____<br>Nausea ____<br>Pneumonia ____<br>Sore throat____<br>Vomiting ____<br>Other symptoms...please specify? |  |  |  |
| Q28. Would you like to tell anything else about these symptoms?           |                                                                                                                                                                    |  |  |  |
| Q29. Have you received messages about Corona virus prevention?            |                                                                                                                                                                    |  |  |  |
| Q30. Where have you received these messages? (please tick all that apply) | TV ____<br>Radio____<br>Phone texts ____<br>Phone calls ____<br>Neighborhood ____<br>Friends ____<br>Family ____<br>Other (Please specify)                         |  |  |  |

| Questions related to <b>Depression</b>                                                                |        |            |           |        |       | Coding |
|-------------------------------------------------------------------------------------------------------|--------|------------|-----------|--------|-------|--------|
| <i>Over the past 2 weeks, how often have you been bothered by any of the following problems?</i>      |        |            |           |        |       |        |
|                                                                                                       | Always | Very Often | Sometimes | Rarely | Never |        |
| Q31. Little interest and pleasure in doing things                                                     |        |            |           |        |       |        |
| Q32. Feeling down, depressed or hopeless                                                              |        |            |           |        |       |        |
| Q33. Trouble falling/staying asleep, sleeping too much                                                |        |            |           |        |       |        |
| Q34. Feeling tired or having little energy                                                            |        |            |           |        |       |        |
| Q35. Feeling bad about yourself – or that you are a failure or have let yourself or your family down? |        |            |           |        |       |        |

|                                                                                                                                                                                                                |  |  |  |  |  |  |
|----------------------------------------------------------------------------------------------------------------------------------------------------------------------------------------------------------------|--|--|--|--|--|--|
| Q36. Trouble concentrating on things such as reading newspaper or watching television                                                                                                                          |  |  |  |  |  |  |
| Q37. Moving or speaking so slowly that other people could have noticed. Or the opposite – being so fidgety or restless that you have been moving around a lot more than usual                                  |  |  |  |  |  |  |
| Q38. Thoughts that you would be better off dead or of hurting yourself someday                                                                                                                                 |  |  |  |  |  |  |
| Q39. Have you ever been to see a practitioner for being sad or depressed? (Please indicate which practitioner or healer/ date of last visit/ medicine prescribed/ still continuing medicine/ if not, why not?) |  |  |  |  |  |  |

| Questions related to <b>Mobility</b>                                                                                                                                           |                 |                  |                  |                      |                  | Coding |
|--------------------------------------------------------------------------------------------------------------------------------------------------------------------------------|-----------------|------------------|------------------|----------------------|------------------|--------|
| This information will help keep track of how well you feel and how well you are able to do your usual activities?                                                              |                 |                  |                  |                      |                  |        |
| Q40. In general, would you say your health is:                                                                                                                                 | Excellent       | Very Good        | Good             | Fair                 | Poor             |        |
| The following questions are about activities you might do during a typical day. Does your health now limit you in these activities? If so, how much?                           |                 |                  |                  |                      |                  |        |
| Q41. Moderate activities, such as moving a table, pushing a vacuum cleaner, cleaning house                                                                                     | All of the time | Most of the time | Some of the time | A little of the time | None of the time |        |
| Q42. Climbing several flights of stairs                                                                                                                                        | All of the time | Most of the time | Some of the time | A little of the time | None of the time |        |
| During the past 4 weeks, how much of the time have you had any of the following problems with your work or other regular daily activities as a result of your physical health? |                 |                  |                  |                      |                  |        |
| Q43. Accomplished less than you would like                                                                                                                                     | All of the time | Most of the time | Some of the time | A little of the time | None of the time |        |
| Q44. Were limited in kind of work or other activities                                                                                                                          | All of the time | Most of the time | Some of the time | A little of the time | None of the time |        |

**SECTION C:****WOMEN'S HEALTH CARE EXPERIENCES SURVEY**

|                                                                                                                                                                                                                                                                 |           |            |           |        |       |  |
|-----------------------------------------------------------------------------------------------------------------------------------------------------------------------------------------------------------------------------------------------------------------|-----------|------------|-----------|--------|-------|--|
| Q45. Compared to other women your age, how would you rate your health<br>Apni hum umar auraton ki nisbat aap apni sehat ka kya mayaar samjhtay hain?                                                                                                            | Excellent | Very Good  | Good      | Fair   | Poor  |  |
| Q46. Do you feel your health could be better than it is presently?<br>Kya apki sehat ke mayaar mai koi behtari lai ja sakti hai?                                                                                                                                | Always    | Very Often | Sometimes | Rarely | Never |  |
| Q47. Does your husband/ male relative/in-laws decide/ give approval when you or your children need consultation from a medical practitioner<br>Kya apka khawand/susral apko doctor pe janay ki ijazat deta hai? Kya ye faisla bhi apka susral/khawand krta hai? | Always    | Very Often | Sometimes | Rarely | Never |  |
| Please indicate if you have experienced any of the following <b>health issues</b> in the last 12 months?                                                                                                                                                        |           |            |           |        |       |  |
| Q48. Minor illness like the flu or an infection<br>Pichlay 12 mahinay mai apko nazla ya infection hua hai?                                                                                                                                                      | 1. Yes    | 2. No      |           |        |       |  |
| Q49. Had to go for a checkup or routine physical exam<br>Jismani muaaenay ke liye gae hain?                                                                                                                                                                     | 1. Yes    | 2. No      |           |        |       |  |
| Q50. Were you pregnant?<br>Kya app hamla theen?                                                                                                                                                                                                                 | 1. Yes    | 2. No      |           |        |       |  |
| Q51. Did you need family planning or preconceptional services?<br>Kya apko munsoba bandi ki zaroorat thee?                                                                                                                                                      | 1. Yes    | 2. No      |           |        |       |  |
| Q52. Did you have an injury that you have not already mentioned?<br>Kya apko koi chot lagi hai?                                                                                                                                                                 | 1. Yes    | 2. No      |           |        |       |  |
| Q53. Did you need care for a chronic health problem, (that is one that goes on for a long time)?                                                                                                                                                                | 1. Yes    | 2. No      |           |        |       |  |

|                                                                                                                                                                                                           |        |       |                         |  |  |  |
|-----------------------------------------------------------------------------------------------------------------------------------------------------------------------------------------------------------|--------|-------|-------------------------|--|--|--|
| Kya apko kisi taweel bemari ke liye hospital jana para hai?                                                                                                                                               |        |       |                         |  |  |  |
| Q54. Did you need surgery for a condition not already mentioned?<br>Kya apko operation keranay ki zaroorat parhi?                                                                                         | 1. Yes | 2. No | If yes, what?           |  |  |  |
| Q55. Were you feeling depressed, anxious, or highly stressed?<br>Kya iski waja se apko kisi kisam ka zehni dabao ya bechaini mehsoos hui hai?                                                             | 1. Yes | 2. No | Could you pinpoint why? |  |  |  |
| Q56. Have you had one of the following <b>medical tests</b> in the last 12 months?                                                                                                                        |        |       |                         |  |  |  |
| Cancer screening, (or check for blood in your stool, sigmoidoscopy, or colonoscopy)                                                                                                                       | 1. Yes | 2. No |                         |  |  |  |
| Test for glaucoma or pressure in the eye                                                                                                                                                                  | 1. Yes | 2. No |                         |  |  |  |
| Blood cholesterol test                                                                                                                                                                                    | 1. Yes | 2. No |                         |  |  |  |
| Check for high blood pressure                                                                                                                                                                             | 1. Yes | 2. No |                         |  |  |  |
| Test for diabetes                                                                                                                                                                                         | 1. Yes | 2. No |                         |  |  |  |
| Breast or abdominal ultrasound                                                                                                                                                                            | 1. Yes | 2. No |                         |  |  |  |
| Mammogram                                                                                                                                                                                                 | 1. Yes | 2. No |                         |  |  |  |
| Pap test                                                                                                                                                                                                  | 1. Yes | 2. No |                         |  |  |  |
| Bone density test (for osteoporosis)                                                                                                                                                                      | 1. Yes | 2. No |                         |  |  |  |
| Genetic screening test                                                                                                                                                                                    | 1. Yes | 2. No |                         |  |  |  |
| Screening for HIV/AIDS                                                                                                                                                                                    | 1. Yes | 2. No |                         |  |  |  |
| Screening for sexually transmitted diseases                                                                                                                                                               | 1. Yes | 2. No |                         |  |  |  |
| Dental exam                                                                                                                                                                                               | 1. Yes | 2. No |                         |  |  |  |
| Shot for flu or pneumonia                                                                                                                                                                                 | 1. Yes | 2. No |                         |  |  |  |
| Pregnancy test                                                                                                                                                                                            | 1. Yes | 2. No |                         |  |  |  |
| Corona                                                                                                                                                                                                    | 1. Yes | 2. No |                         |  |  |  |
| Tests for infertility                                                                                                                                                                                     | 1. Yes | 2. No |                         |  |  |  |
| Malaria                                                                                                                                                                                                   | 1. Yes | 2. No |                         |  |  |  |
| Another other test (please specify)?                                                                                                                                                                      |        |       |                         |  |  |  |
| Q57. In the past 12 months, did any of your health care providers give you <b>information</b> about?<br>(pichlay 12 mahino mai kya apkay doctor/nurse ne aap se in chizon ke baray mai maloomat di hain?) |        |       |                         |  |  |  |
| Smoking, second-hand smoke, or quitting smoking                                                                                                                                                           | 1. Yes | 2. No |                         |  |  |  |



|                                                                                                                |       |      |  |  |  |
|----------------------------------------------------------------------------------------------------------------|-------|------|--|--|--|
| Tambako noshi, kisi aisay shaks k saath bethna/rehna jo tambako noshi mein mulawis ho, ya tambako noshi chorna |       |      |  |  |  |
| Nutrition or diet (Khuraak)                                                                                    | 1.Yes | 2.No |  |  |  |
| Alcohol or drug use Shraab ya adviyaat?                                                                        | 1.Yes | 2.No |  |  |  |
| Physical fitness or exercise Jismani sehat ya warzish?                                                         | 1.Yes | 2.No |  |  |  |
| Menopause or hormone replacement therapy San – e - yaas ya hormone tabdeeli therapy?                           | 1.Yes | 2.No |  |  |  |
| Hygiene                                                                                                        | 1.Yes | 2.No |  |  |  |
| Sanitation                                                                                                     | 1.Yes | 2.No |  |  |  |
| How to protect against infectious diseases                                                                     | 1.Yes | 2.No |  |  |  |
| Work or financial problems Kaam ya muaashi mushkilaat ka samna hua hai?                                        | 1.Yes | 2.No |  |  |  |
| Family or relationship problems Ghar walon ya rishtadaron ke masa'il?                                          | 1.Yes | 2.No |  |  |  |
| Importance of child health and nutrition Bachon ki sehat or khuraak ki ehmiyat?                                | 1.Yes | 2.No |  |  |  |
| Stress management Zehani dabao ko kum karna                                                                    | 1.Yes | 2.No |  |  |  |
| Preventing unintended pregnancies & birth spacing Bachon ke darmiya wakfa?                                     | 1.Yes | 2.No |  |  |  |
| Using alternative therapies, such as herbs or acupuncture                                                      | 1.Yes | 2.No |  |  |  |
| Preventing osteoporosis Hadion ke dard se bachao                                                               | 1.Yes | 2.No |  |  |  |
| Nutritional needs for you and family                                                                           | 1.Yes | 2.No |  |  |  |
| Ways to avoid food shortages                                                                                   | 1.Yes | 2.No |  |  |  |
| Improve self-sufficiency for food security                                                                     | 1.Yes | 2.No |  |  |  |
| Q58. Are there any <b>dietary supplements</b> that you have used in the last 12 months?                        |       |      |  |  |  |
| Vitamin C                                                                                                      | 1.Yes | 2.No |  |  |  |
| Vitamin D                                                                                                      | 1.Yes | 2.No |  |  |  |
| Vitamin E                                                                                                      | 1.Yes | 2.No |  |  |  |

|                                                                                                                                                                                                    |                    |                     |                     |                            |                             |  |
|----------------------------------------------------------------------------------------------------------------------------------------------------------------------------------------------------|--------------------|---------------------|---------------------|----------------------------|-----------------------------|--|
| B Complex                                                                                                                                                                                          | 1.Yes              | 2.No                |                     |                            |                             |  |
| Calcium                                                                                                                                                                                            | 1.Yes              | 2.No                |                     |                            |                             |  |
| Pregnancy Vitamin                                                                                                                                                                                  | 1.Yes              | 2.No                |                     |                            |                             |  |
| Lactation Vitamin                                                                                                                                                                                  | 1.Yes              | 2.No                |                     |                            |                             |  |
| General Multi-vitamin                                                                                                                                                                              | 1.Yes              | 2.No                |                     |                            |                             |  |
| Q59. What is your personal preference for health services?<br>Tibbi saholiyat se mutalik apki zaati tarjihaat kya hain?                                                                            |                    |                     |                     |                            |                             |  |
| Family (e.g. mother/ mother-in-law/ aunt)<br>Ghar walay?                                                                                                                                           | 1.Yes              | 2.No                |                     |                            | If Yes,<br>describe<br>who: |  |
| A women's health center where you can get<br>most of your basic health care, including<br>gynecological care, in one place<br>Khawateen ki sehat markaz?                                           | 1.Yes              | 2.No                |                     |                            |                             |  |
| Trusted community member<br>Baradari?                                                                                                                                                              | 1.Yes              | 2.No                |                     |                            |                             |  |
| A nurse or community healthcare provider (Not<br>a physician/ surgeon/ medical consultant)                                                                                                         | 1.Yes              | 2.No                |                     |                            |                             |  |
| Public Hospital                                                                                                                                                                                    | 1.Yes              | 2.No                |                     |                            |                             |  |
| Local female healer                                                                                                                                                                                | 1.Yes              | 2.No                |                     |                            |                             |  |
| Private Clinic                                                                                                                                                                                     | 1.Yes              | 2.No                |                     |                            |                             |  |
| Q60. In general, how difficult have you found it<br>to talk to community healthcare provider about<br>your personal health concerns?<br>doctor/nurse se baat krna apko kitna mushkil<br>lagta hai? | All of the<br>time | Most of<br>the time | Some of<br>the time | A little<br>of the<br>time | None of<br>the time         |  |
| Please rate the community healthcare provider <b>services</b> as you have experienced them in the past?                                                                                            |                    |                     |                     |                            |                             |  |
| Q61. Listening to what you have to say<br>Kya apki baat ghor se suntay hain?                                                                                                                       | All of the<br>time | Most of<br>the time | Some of<br>the time | A little<br>of the<br>time | None of<br>the time         |  |
| Q62. Talking to you in a respectful and caring<br>manner<br>Kya ap se izzat se baat kartay hai?                                                                                                    | All of the<br>time | Most of<br>the time | Some of<br>the time | A little<br>of the<br>time | None of<br>the time         |  |
| Q63. Speaking to you in the language/ dialect<br>you understand better<br>Kya apse apki madri zubaan mai baat krtay hai                                                                            | All of the<br>time | Most of<br>the time | Some of<br>the time | A little<br>of the<br>time | None of<br>the time         |  |

|                                                                                                                                                                              |                 |                  |                  |                      |                  |  |
|------------------------------------------------------------------------------------------------------------------------------------------------------------------------------|-----------------|------------------|------------------|----------------------|------------------|--|
| Q64. Answering your questions clearly<br>Ap ke sawalon ka sahi se jawaab detay hai?                                                                                          | All of the time | Most of the time | Some of the time | A little of the time | None of the time |  |
| Q65. Giving you the opportunity to ask all of your questions<br>Apko sawaal puchnay ka wakt detay hai?                                                                       | All of the time | Most of the time | Some of the time | A little of the time | None of the time |  |
| Q66. Helping you to feel comfortable talking about your personal or sensitive health concerns<br>Kya ap asaani se unhe apnay masaael ke baray mai bata deti hain?            | All of the time | Most of the time | Some of the time | A little of the time | None of the time |  |
| Q67. Giving you complete health information<br>Kya sehat se mutalik tamaam jankari detay hain?                                                                               | All of the time | Most of the time | Some of the time | A little of the time | None of the time |  |
| Q68. Discussing alternative therapies, diet and lifestyle<br>Kya ap se mutabadil therapy ya khuraq ya roz mara ki zindagi guzarnay kay tareekay pe tabadal e khayal kya hai? | All of the time | Most of the time | Some of the time | A little of the time | None of the time |  |
| Q69. Giving you complete information about any tests or services<br>Test ke baray mai mukamal jaankari detay hain?                                                           | All of the time | Most of the time | Some of the time | A little of the time | None of the time |  |
| Q70. Giving you the results of your tests<br>Test ke nataij batatay hain?                                                                                                    | All of the time | Most of the time | Some of the time | A little of the time | None of the time |  |
| Q71. Giving you complete information about all your options for treatments<br>Kya ilaaj ke mutalik apko mukamal jaankari detay hai?                                          | All of the time | Most of the time | Some of the time | A little of the time | None of the time |  |
| Q72. Giving you the opportunity to make important decisions about your health care<br>Kya sehat se mutalik tamam faislay apko karnay detay hai?                              | All of the time | Most of the time | Some of the time | A little of the time | None of the time |  |
| Q73. Giving you written, printed or digital information when you need it<br>Malumaat likh kr dete hai?                                                                       | All of the time | Most of the time | Some of the time | A little of the time | None of the time |  |
| Q74. Spending enough time with you during your visits                                                                                                                        | All of the time | Most of the time | Some of the time | A little of the time | None of the time |  |

|                                                                                                                                                                                        |                 |                  |                      |                      |                  |  |
|----------------------------------------------------------------------------------------------------------------------------------------------------------------------------------------|-----------------|------------------|----------------------|----------------------|------------------|--|
| Apko tasali bakhsh wakt detay hai?                                                                                                                                                     |                 |                  |                      | time                 |                  |  |
| Q75. Treating you like a partner in your health care<br>Apka sathi bun kr apki sehat ka khayal rakhtay hai?                                                                            | All of the time | Most of the time | Some of the time     | A little of the time | None of the time |  |
| Q76. Which are the primary/ most important sources you depend on for making health decisions? (Tick relevant options)<br>Sehat se mutalik faislon ke liye ap kis se mashwara leti hai? |                 |                  |                      |                      |                  |  |
| Husband                                                                                                                                                                                |                 |                  |                      |                      |                  |  |
| Mother in law                                                                                                                                                                          |                 |                  |                      |                      |                  |  |
| Other in-laws                                                                                                                                                                          |                 |                  |                      |                      |                  |  |
| Blood family (parents, siblings, children...)                                                                                                                                          |                 |                  |                      |                      |                  |  |
| Newspapers / magazines                                                                                                                                                                 |                 |                  |                      |                      |                  |  |
| Health newsletter                                                                                                                                                                      |                 |                  |                      |                      |                  |  |
| TV                                                                                                                                                                                     |                 |                  |                      |                      |                  |  |
| Radio                                                                                                                                                                                  |                 |                  |                      |                      |                  |  |
| Internet                                                                                                                                                                               |                 |                  |                      |                      |                  |  |
| Mobile services                                                                                                                                                                        |                 |                  |                      |                      |                  |  |
| Family/ friends                                                                                                                                                                        |                 |                  |                      |                      |                  |  |
| Community                                                                                                                                                                              |                 |                  |                      |                      |                  |  |
| Medical Practitioner                                                                                                                                                                   |                 |                  |                      |                      |                  |  |
| Local Healer                                                                                                                                                                           |                 |                  |                      |                      |                  |  |
| Local Imam/ religious leader                                                                                                                                                           |                 |                  |                      |                      |                  |  |
| Other (Please list)                                                                                                                                                                    |                 |                  |                      |                      |                  |  |
| <b>Current Health Risks</b>                                                                                                                                                            |                 |                  |                      |                      |                  |  |
| Q77. Do you currently smoke?<br>Kya app tambako noshi mein mulawis hain?                                                                                                               | 1.Yes           | 2.No             |                      |                      |                  |  |
| Q78. Does anyone else smoke in the house when you/ children are in same room?<br>Kya koi aur tambako noshi mein mulawis hain                                                           | 1.Yes           | 2.No             | If yes, who is this: |                      |                  |  |
| Q79. Do you feel anxious, stressed, depressed, suicidal?<br>Kya app kabhi bechain hotay hain ya zehni dabao ka shakar ya khud kushi ka khayal aya hai?                                 | 1.Yes           | 2.No             | Indicate which:      |                      |                  |  |
| Q80. Do you take any drugs (to relieve                                                                                                                                                 |                 |                  | If yes, which ones:  |                      |                  |  |

|                                                                                                                                                                        |                 |                  |                  |                      |                  |  |
|------------------------------------------------------------------------------------------------------------------------------------------------------------------------|-----------------|------------------|------------------|----------------------|------------------|--|
| yourselves of stress or an ailment?<br>Kya app in ke liye koi dawa laitay hain?                                                                                        | 1.Yes           | 2.No             |                  |                      |                  |  |
| Are you facing any disability which?<br>Kya aap kisi mazoori ka shikaar hain?                                                                                          |                 |                  |                  |                      |                  |  |
| Q81. Does your disability keeps you from participating fully in your ability to take care of your family<br>Jiski waja se ap apnay ghar walon ka khayal na rakh sakain | All of the time | Most of the time | Some of the time | A little of the time | None of the time |  |
| Q82. Does your disability keep you from participating fully in your ability to continue with your life<br>Apnay karobaar mai sahi se kaam na kr sakain                 | All of the time | Most of the time | Some of the time | A little of the time | None of the time |  |

**SECTION D:****BASELINE NUTRITION AND FOOD SECURITY SURVEY UNICEF**

|                                                                                                                                                                                                              |                 |                  |                  |                      |                  |  |
|--------------------------------------------------------------------------------------------------------------------------------------------------------------------------------------------------------------|-----------------|------------------|------------------|----------------------|------------------|--|
| Q83. In the past 6 months did you find it too expensive to purchase the foods you needed to feed your family?<br>Pichlay 6 maah mai kya apko khaandan ko palnay ke liye khana lenay mai mushkilaat hoti hai? | All of the time | Most of the time | Some of the time | A little of the time | None of the time |  |
| Q84. Did you find it too expensive to purchase fruit?<br>Kya phal khareedna bohat mehnga hai?                                                                                                                | All of the time | Most of the time | Some of the time | A little of the time | None of the time |  |
| Q85. Did you find it too expensive to purchase vegetables?<br>Kya sabzi khareedna bohat mehnga hai?                                                                                                          | All of the time | Most of the time | Some of the time | A little of the time | None of the time |  |
| Q86. Did you find it too expensive to purchase meat?<br>Kya gosht khareedna bohat mehnga hai?                                                                                                                | All of the time | Most of the time | Some of the time | A little of the time | None of the time |  |
| Q87. Did you find it too expensive to purchase eggs?<br>Kya anday khareedna bohat mehnga hai?                                                                                                                | All of the time | Most of the time | Some of the time | A little of the time | None of the time |  |
| Q88. Did you find it too expensive to purchase milk?                                                                                                                                                         | All of the time | Most of the time | Some of the time | A little of the time | None of the time |  |

|                                                                                                                                                                                                                  |                 |                  |                  |                      |                  |  |
|------------------------------------------------------------------------------------------------------------------------------------------------------------------------------------------------------------------|-----------------|------------------|------------------|----------------------|------------------|--|
| Kya doodh khareedna bohat mehnga hai?                                                                                                                                                                            |                 |                  |                  | time                 |                  |  |
| Q89. Did you find it too expensive to purchase wheat, for roti?<br>Kya roti khareedna bohat mehnga hai?                                                                                                          | All of the time | Most of the time | Some of the time | A little of the time | None of the time |  |
| Q90. In the last 3 months were you worried about running out of food because of high costs?<br>Pichlay 3 maah mai mehngai ki waja se khana na khareed panay ka dart ha?                                          | All of the time | Most of the time | Some of the time | A little of the time | None of the time |  |
| Q91. In the last 3 months did you run out of food because of expense?<br>Pichlay 3 maah mai kya mehngai ki waja se kabhi ghar mai khana khatam ho gaya ho?                                                       | All of the time | Most of the time | Some of the time | A little of the time | None of the time |  |
| Q92. In the last 3 months did you or any other adult in the house skip meals because there was not enough food?<br>Pichlay 3 maah mai aap ya kisi or ghar walay se khana kum honay ki waja se khana na khaya ho? | All of the time | Most of the time | Some of the time | A little of the time | None of the time |  |
| Q93. In the last 3 months did you ever think your children are still hungry because of not being fed enough food?<br>Pichlay 3 maah mai apko kabhi laga ke apkay bachay bhokay hai kyunkay khana pura nai tha?   | All of the time | Most of the time | Some of the time | A little of the time | None of the time |  |
| Q94. In the last 3 months did any of your children go to bed hungry?<br>Pichlay 3 maah mai kya apkay bachay kabhi bhokay soe houn?                                                                               | All of the time | Most of the time | Some of the time | A little of the time | None of the time |  |

ڈیجیٹل سائنس یا بٹن / ٹیب قبولیت کے لئے

تحقیق کے حصہ لینے والے کے لئے رضامندی کا خط

گڈی باجیوں کے ذریعہ صوبائی زبان میں فون پر ترجمہ پڑھنا / ریکارڈ کرنا

آپ کے قیمتی وقت کا شکریہ۔

ہم آپ سے درخواست کرتے ہیں کہ اس تحقیقی منصوبے میں حصہ لیں اس سے آپ اور آپ کے اہل خانہ کو صحت اور تندرستی کے حوالے سے فائدہ ہو۔ جیسا کہ آپ جانتے ہیں کہ کورونا وائرس آپ کو اپنے ایل ایچ ڈبلیو سے ملنے سے روک رہا ہے اس لئے ہم گڈی باجیوں کو موبائل ڈیوائس کے ذریعہ آپ کے پاس لا رہے ہیں صحت کی خدمات کے ساتھ۔ اگر آپ اس تحقیق میں حصہ لینے پر راضی ہیں تو ، آپ کو ایک اسمارٹ فون اور انٹرنیٹ فراہم کیا جائے گا آپ کی دہلیز پر۔

تحقیق میں ایک تعلیمی پروگرام بھی شامل ہے ، جو آپ کی صحت کے لئے کلیدی شعبوں میں آپ کی مدد کے لئے تیار کیا گیا ہے۔ مثال کے طور پر ، آپ کی صحت کی موجودہ مشکلات کو سمجھنا حفظان صحت ، انفیکشن سے متعلق تحفظ کے سلسلے میں آپ کو صحت خواندگی اور آگاہی فراہم کرنا، اور صحت سے متعلق کوئی اور مدد آپ کی ضرورت ہوسکتی ہے ، اور آپ کو اور آپ کے اہل خانہ کی غذائی ضروریات کو پہچاننے اور کھانے کی حفاظت میں بہتری لانے میں آپ کی مدد کریں۔

اس تعلیمی پروگرام میں ایک فون کے ذریعہ آپ کی گڈی باجیوں کے ساتھ تین ماہ کی روزانہ کی مواصلات اور مشغولیت شامل ہوگی۔ اس مصروفیت کے دوران ، آپ سے سوالات پوچھے جا سکتے ہیں اور آپ کے جوابات ریکارڈ کیے جائیں گے ، لیکن وہ مکمل طور پر خفیہ ہوں گے۔ آپ کے نام کی ضرورت نہیں ہے اور تمام تحقیقی تجزیے مکمل گمنامی کے ساتھ کیے جائیں گے۔ آپ کے نام کی ضرورت نہیں ہے اور تمام تحقیقی تجزیے مکمل گمنامی کے ساتھ کیے جائیں گے۔

آپ اس تعلیمی پروگرام کے دوران کسی بھی موقع پر دستبرداری کا انتخاب کرسکتے ہیں۔ اگر آپ کو کسی بھی وقت مزید سوالات اور وضاحت کی ضرورت ہو تو ، کسی بھی وقت ہم سے رابطہ کریں۔

آپ کے وقت کا شکریہ اور ہم اس منصوبے پر مل کر کام کرنے کے منتظر ہیں آپ کی صحت اور تندرستی کو بہتر بنانے کے لئے۔

ڈاکٹر سارہ رضوی جعفری ،

تحقیقاتی تفتیش کار

اسسٹنٹ پروفیسر ، فورمان کرسچن کالج | یونیورسٹی

sarajafree@fccolleg.edu.pk

0300 400 5740

**Survey for Health Status of Women in the Age of Corona-Translation**

شرکاء کی جانب سے سوالنامہ فون پر پڑھ کر گائیڈ بجیز کے ذریعہ مکمل کیا جائے گا

صوبہ / شہر: \_\_\_\_\_

ضلع: \_\_\_\_\_

گائیڈ بجیز کوڈ: \_\_\_\_\_

شرکاء کا کوڈ: \_\_\_\_\_

سیکشن اے

معاشرتی و آبادیاتی خال: سیکشن اے

|                                   |                      |                 |                          |                           | Coding |
|-----------------------------------|----------------------|-----------------|--------------------------|---------------------------|--------|
| عمر<br>Q1                         |                      |                 |                          |                           |        |
| مذہب<br>Q2                        | 1. مسلمان            | 2. مسیحی        | 3. ہندو                  | 4. دیگر                   |        |
| ازدواجی حیثیت<br>Q3               | 1. غیر شادی شدہ      | 2. شادی شدہ     | 3. علیحدگی/طلاق شدہ      | 4. بیوہ                   |        |
| رہائش کا موجودہ مقام<br>Q4        | 1. شہری              | 2. نیم شہری     | 3. دیہاتی                |                           |        |
| تعلیم<br>Q5                       | 1. نا خواندگی        | 2. پرائمری      | 3. ہائی اسکول یا سیکنڈری | 4. گریجویشن یا اس سے اوپر |        |
| رہائش کی قسم<br>Q6                | 1. کچا               | 2. پکا          | 3. نیم پکا               | دیگر (وضاحت)              |        |
| مکان کی ملکیت<br>Q7               | 1. ذاتی طور پر ملکیت | 2. کرائے پر لیا | 3. کسی کے ساتھ رہنا      | 4. دیگر (وضاحت)           |        |
| پیشہ<br>Q8                        | 1. بے روزگار         | 2. ملازمت پیشہ  | 3. ملازمت کی قسم         |                           |        |
| آپ کی ماہانہ آمدنی کتنی ہے؟<br>Q9 |                      |                 |                          |                           |        |
| شریک حیات کی خواندگی              | 1. نا خواندگی        | 2. پرائمری      | 3. ہائی اسکول یا         | 4. گریجویشن               |        |



|                                                |              |                   |                  |               |  |
|------------------------------------------------|--------------|-------------------|------------------|---------------|--|
| <b>Q10</b>                                     |              |                   | سیکنٹری          | یا اس سے اوپر |  |
| شریک حیات کا پیشہ<br><b>Q11</b>                | 1. بے روزگار | 2. ملازمت<br>پیشہ | 3. ملازمت کی قسم |               |  |
| آپ کے کتنے بچے ہیں؟<br><b>Q12</b>              |              |                   |                  |               |  |
| آپ کے آخری بچے کی عمر کتنی ہے؟<br><b>Q13</b>   |              |                   |                  |               |  |
| گھر میں رہنے والے افراد کی تعداد<br><b>Q14</b> |              |                   |                  |               |  |

|                                                                                             |        |         |                                        |  |
|---------------------------------------------------------------------------------------------|--------|---------|----------------------------------------|--|
| گھر میں کمروں کی تعداد<br><b>Q15</b>                                                        |        |         |                                        |  |
| کیا آپ فی الحال کسی معذور / منحصر<br>خاندانی ممبر کی دیکھ بھال کر رہے<br>ہیں؟<br><b>Q16</b> | 1. ہاں | 2. نہیں | اگر ہاں ، تو کون                       |  |
| کیا آپ کے گھر میں مندرجہ ذیل چیزیں<br>ہیں: (لاگو تمام چیزوں پر نشان لگائیں)<br><b>Q17</b>   |        |         |                                        |  |
| ٹی وی                                                                                       |        |         |                                        |  |
| ریڈیو                                                                                       |        |         |                                        |  |
| لینڈ لائن                                                                                   |        |         |                                        |  |
| ایک دن میں کم از کم 8 گھنٹے بجلی                                                            |        |         |                                        |  |
| انٹرنیٹ کے ساتھ موبائل فون                                                                  |        |         |                                        |  |
| واشنگ مشین                                                                                  |        |         |                                        |  |
| فلش کے ساتھ گھر میں ٹوالیٹ کی<br>سہولت                                                      |        |         | اگر نہیں تو ، آپ کیا استعمال کرتے ہیں؟ |  |
| نل سے پانی پینا                                                                             |        |         | اگر نہیں تو ، آپ کیا استعمال کرتے ہیں؟ |  |

|                                                                                                     |  |                                        |  |
|-----------------------------------------------------------------------------------------------------|--|----------------------------------------|--|
| گٹر نکاسی آب                                                                                        |  | اگر نہیں تو ، آپ کیا استعمال کرتے ہیں؟ |  |
| گیس کنکشن کے ساتھ کھانا پکانے کے لئے چولہا                                                          |  | اگر نہیں تو ، آپ کیا استعمال کرتے ہیں؟ |  |
| کچرا اٹھانے والے کوڑے کو ٹھکانے لگانے آتے ہیں                                                       |  | اگر نہیں تو ، آپ کیا استعمال کرتے ہیں؟ |  |
| کیا آپ کوئی صحت انشورنس لے رہے ہیں (براہ کرم اسکیم / قسط / کوریج کی وضاحت کریں)؟<br><b>Q18</b>      |  |                                        |  |
| کیا آپ کی کوئی بچت ہے؟ (تقریباً کتنا؟)<br><b>Q19</b>                                                |  |                                        |  |
| کیا آپ نے فرض لیا ہے؟ (کہاں سے ، مدت کتنی ہے ، رقم کتنی ہے ، کتنی قسط ادا کر رہے ہو؟)<br><b>Q20</b> |  |                                        |  |

|                                                                                                                                       | 1.ہاں | 2.نہیں | اگر ہاں ، تو کیا آپ صحت کے مسئلے کی وضاحت کر سکتے ہیں؟ | Coding |
|---------------------------------------------------------------------------------------------------------------------------------------|-------|--------|--------------------------------------------------------|--------|
| پچھلے 12 مہینوں کے دوران آپ کو کسی بیماری یا صحت کی پریشانی کے سبب اسپتال میں داخل کیا گیا ہے؟<br><b>Q21</b>                          |       |        |                                                        |        |
| پچھلے 12 مہینوں میں اسپتال میں داخل ہونے کے علاوہ ، مشورے کے لئے آپ نے کتنی بار سرکاری اسپتال کا دورہ کیا؟<br><b>Q22</b>              |       |        |                                                        |        |
| آپ اپنے معاشرتی صحت کی دیکھ بھال فراہم کرنے والے کے ذریعہ ایک مہینے میں کتنی بار تشریف لیتے ہیں یا ان کا دورہ کرتے ہیں؟<br><b>Q23</b> |       |        |                                                        |        |
| آپ فی الحال کتنی مختلف قسم کی دوائیوں / ادویات لے رہے ہیں؟<br><b>Q24</b>                                                              |       |        |                                                        |        |

سیکشن بی:

(MAQ-PC) ابتدائی نگہداشت کے لئے متعدد اثاثوں سے متعلق سوال

| برائے کرم درج ذیل دائمی بیماریوں کے بارے میں معلومات فراہم کریں<br>Q25 |  | ہاں.1 | نہیں.2 | Codi<br>ng |
|------------------------------------------------------------------------|--|-------|--------|------------|
| گٹھیا                                                                  |  | 1.ہاں | 2.نہیں |            |
| ذیابیطس                                                                |  | 1.ہاں | 2.نہیں |            |
| ہائی بلڈ پریشر                                                         |  | 1.ہاں | 2.نہیں |            |
| ایسڈ پیپٹک امراض                                                       |  | 1.ہاں | 2.نہیں |            |
| دائمی کمر میں درد                                                      |  | 1.ہاں | 2.نہیں |            |
| دل کی بیماری                                                           |  | 1.ہاں | 2.نہیں |            |
| اسٹروک                                                                 |  | 1.ہاں | 2.نہیں |            |
| اندھا پن                                                               |  | 1.ہاں | 2.نہیں |            |
| بہرا پن                                                                |  | 1.ہاں | 2.نہیں |            |
| ڈیمینشیا                                                               |  | 1.ہاں | 2.نہیں |            |
| الکحل کی خرابی                                                         |  | 1.ہاں | 2.نہیں |            |
| کینسر                                                                  |  | 1.ہاں | 2.نہیں |            |

|                                                                                                                                             |                                                                                                                                                                                                                                                                |         |                              |  |
|---------------------------------------------------------------------------------------------------------------------------------------------|----------------------------------------------------------------------------------------------------------------------------------------------------------------------------------------------------------------------------------------------------------------|---------|------------------------------|--|
| گردے کی دائمی بیماری                                                                                                                        |                                                                                                                                                                                                                                                                | 1. ہاں  | 2. نہیں                      |  |
| مرگی                                                                                                                                        |                                                                                                                                                                                                                                                                | 1. ہاں  | 2. نہیں                      |  |
| تائروائڈ کی بیماری                                                                                                                          |                                                                                                                                                                                                                                                                | 1. ہاں  | 2. نہیں                      |  |
| تپ دق                                                                                                                                       |                                                                                                                                                                                                                                                                | 1. ہاں  | 2. نہیں                      |  |
| فیلا ریاسس                                                                                                                                  |                                                                                                                                                                                                                                                                | 1. ہاں  | 2. نہیں                      |  |
| کورونا وائرس سے متعلق سوالات                                                                                                                |                                                                                                                                                                                                                                                                |         |                              |  |
| کیا آپ کورونا وائرس کے علامات سے واقف ہیں؟<br><b>Q26</b>                                                                                    | 1. ہاں                                                                                                                                                                                                                                                         | 2. نہیں |                              |  |
| کیا آپ نے یا آپ کے خاندان کے کسی فرد نے پچھلے 8 مہینوں میں درج ذیل میں سے کوئی تجربہ کیا ہے؟ (براہ کرم ہر ایک پر نشان لگائیں)<br><b>Q27</b> | کیوٹ ریسیپیٹری ڈسٹریس سنڈروم _____<br>کھانسی _____<br>آشوب چشم _____<br>اسہال _____<br>تھکاوٹ _____<br>بخار _____<br>سردی لگ رہی ہے _____<br>سر درد _____<br>متلی _____<br>نمونیا _____<br>گلے کی سوزش _____<br>التھی _____<br>دیگر علامات... براہ کرم بتائیں؟ |         | ایچ ایچ ممبروں کی شناخت کریں |  |
| کیا آپ ان علامت کے بارے میں کچھ اور بتانا پسند کریں گے؟<br><b>Q28</b>                                                                       |                                                                                                                                                                                                                                                                |         |                              |  |

|                                                                                  |                                                                                                                                          |  |  |  |
|----------------------------------------------------------------------------------|------------------------------------------------------------------------------------------------------------------------------------------|--|--|--|
| کیا آپ کو کورونا وائرس سے بچاؤ کے بارے میں پیغامات موصول ہوئے ہیں؟<br><b>Q29</b> |                                                                                                                                          |  |  |  |
| آپ کو یہ پیغامات کہاں سے ملے ہیں؟ (براہ کرم ہر ایک پر نشان لگائیں)<br><b>Q30</b> | ٹی وی _____<br>ریڈیو _____<br>فون پیغامات _____<br>فون کالز _____<br>پڑوس _____<br>دوست _____<br>کنبہ _____<br>دیگر (وضاحت براہ مہربانی) |  |  |  |

| افسردگی سے متعلق سوالات                                                            |       |      |           |            |           | Coding |
|------------------------------------------------------------------------------------|-------|------|-----------|------------|-----------|--------|
| پچھلے 2 ہفتوں کے دوران ، آپ درج ذیل کسی بھی پریشانی سے کتنی بار پریشان ہو چکے ہیں؟ |       |      |           |            |           |        |
| تھکاوٹ یا توانائی میں کمی محسوس کرنا<br><b>Q31</b>                                 | ہمیشہ | اکثر | کبھی کبھی | شاذ و نادر | کبھی نہیں |        |
| افسردہ یا مایوس محسوس کرنا<br><b>Q32</b>                                           | ہمیشہ | اکثر | کبھی کبھی | شاذ و نادر | کبھی نہیں |        |
| سوئے رہنے میں پریشانی ، بہت زیادہ سو جانا<br><b>Q33</b>                            | ہمیشہ | اکثر | کبھی کبھی | شاذ و نادر | کبھی نہیں |        |
| تھکاوٹ یا توانائی میں کمی محسوس کرنا<br><b>Q34</b>                                 | ہمیشہ | اکثر | کبھی کبھی | شاذ و نادر | کبھی نہیں |        |
| اپنے یا اپنے گھر والوں کے بارے میں ناکامی یا مایوسی کو محسوس کرنا<br><b>Q35</b>    | ہمیشہ | اکثر | کبھی کبھی | شاذ و نادر | کبھی نہیں |        |
| اخبار پڑھنے یا ٹیلی ویژن دیکھنا جیسے چیزوں پر توجہ دینے میں دشواری<br><b>Q36</b>   | ہمیشہ | اکثر | کبھی کبھی | شاذ و نادر | کبھی نہیں |        |
| اتنا اہستہ چلنا یا بولنا کہ دوسرے لوگ متوجہ ہوں اس کے برعکس اتنا گہرا نا یا بے     | ہمیشہ | اکثر | کبھی کبھی | شاذ و نادر | کبھی نہیں |        |

|                                                                                   |       |      |           |            |           |  |
|-----------------------------------------------------------------------------------|-------|------|-----------|------------|-----------|--|
| آرام ہونا کہ آپ معمول سے زیادہ حرکت کرنے لگیں<br><b>Q37</b>                       |       |      |           |            |           |  |
| یہ خیالات کہ آپ مرجائیں تو بہتر ہے یا کسی طرح خود کو تکلیف پہنچائیں<br><b>Q38</b> | بمیشہ | اکثر | کبھی کبھی | شاذ و نادر | کبھی نہیں |  |
| کیا اپنے کبھی افسردہ یا اداس ہونے پر کسی معالج سے رجوع کیا ہے؟<br><b>Q39</b>      |       |      |           |            |           |  |

| مویشی سے متعلق سوالات                                                                                                                                     |        |           |         |           |                  | Coding |
|-----------------------------------------------------------------------------------------------------------------------------------------------------------|--------|-----------|---------|-----------|------------------|--------|
| اس معلومات سے آپ کو یہ معلوم رکھنے میں مدد ملے گی کہ آپ کو کتنا اچھا لگتا ہے اور آپ اپنی معمول کی سرگرمیاں کس حد تک بہتر طریقے سے انجام دے سکتے ہیں؟      |        |           |         |           |                  |        |
| عام طور پر ، کیا آپ کہیں گے کہ آپ کی صحت یہ ہے<br><b>Q40</b>                                                                                              | عمدہ   | بہت اچھی  | اچھی    | بہتر      | ناقص             |        |
| درج ذیل سوالات ان سرگرمیوں کے بارے میں ہیں جو آپ ایک عام دن کے دوران کر سکتے ہیں۔ کیا اب آپ کی صحت آپ کو ان سرگرمیوں میں محدود کرتی ہے؟ اگر ہے تو ، کتنا؟ |        |           |         |           |                  |        |
| اعتدال پسند سرگرمیاں ، جیسے ٹیبل کو حرکت دینا ، ویکوم کلینر کو آگے بڑھانا ، گھر کی صفائی کرنا<br><b>Q41</b>                                               | بر وقت | بیشتر وقت | کچھ وقت | تھوڑا وقت | کسی بھی وقت نہیں |        |
| سیڑھیوں کی کئی پروازیں چڑھنا<br><b>Q42</b>                                                                                                                | بر وقت | بیشتر وقت | کچھ وقت | تھوڑا وقت | کسی بھی وقت نہیں |        |
| پچھلے 4 ہفتوں کے دوران ، آپ کی جسمانی صحت کے نتیجے میں آپ کو اپنے کام یا دیگر معمول کی روزانہ کی سرگرمیوں میں کتنا وقت درپیش ہے؟                          |        |           |         |           |                  |        |
| اپنی پسند سے کم کام کیا<br><b>Q43</b>                                                                                                                     | بر وقت | بیشتر وقت | کچھ وقت | تھوڑا وقت | کسی بھی وقت نہیں |        |
| کسی قسم کے کام یا دیگر سرگرمیوں میں محدود تھے<br><b>Q44</b>                                                                                               | بر وقت | بیشتر وقت | کچھ وقت | تھوڑا وقت | کسی بھی وقت نہیں |        |

## سیکشن سی

## خواتین کی صحت کی دیکھ بھال کے سروے

|                                                |      |          |      |      |      |  |
|------------------------------------------------|------|----------|------|------|------|--|
| اپنی عمر کی دوسری خواتین کے لئے تیار کردہ ، آپ | عمدہ | بہت اچھی | اچھی | بہتر | ناقص |  |
|------------------------------------------------|------|----------|------|------|------|--|

|                                                                                                                                                             |        |         |           |            |           |  |
|-------------------------------------------------------------------------------------------------------------------------------------------------------------|--------|---------|-----------|------------|-----------|--|
| اپنی صحت کی درجہ بندی کیسے کریں گے<br><b>Q45</b>                                                                                                            |        |         |           |            |           |  |
| کیا آپ کو لگتا ہے کہ آپ کی صحت اس وقت کی نسبت بہتر ہو سکتی ہے؟<br><b>Q46</b>                                                                                | بمیشہ  | اکثر    | کبھی کبھی | شاذ و نادر | کبھی نہیں |  |
| کیا آپ کے شوپر / مرد رشتے دار / سسرال والے جب آپ یا آپ کے بچوں کو کسی طبی پیشہ ور سے مشورے کی ضرورت کرتے ہیں تو وہ منظوری دیتے ہیں / دیتے ہیں<br><b>Q47</b> | بمیشہ  | اکثر    | کبھی کبھی | شاذ و نادر | کبھی نہیں |  |
| براہ کرم اس بات کی نشاندہی کریں کہ کیا آپ نے پچھلے 12 مہینوں میں مندرجہ ذیل میں سے کسی صحت سے متعلق مسئلہ کا تجربہ کیا ہے؟                                  |        |         |           |            |           |  |
| معمولی بیماری جیسے فلو یا انفیکشن<br><b>Q48</b>                                                                                                             | 1. ہاں | 2. نہیں |           |            |           |  |
| چیک اپ یا معمول کے جسمانی امتحان کے لئے جانا پڑا؟<br><b>Q49</b>                                                                                             | 1. ہاں | 2. نہیں |           |            |           |  |
| کیا آپ حاملہ تھیں؟<br><b>Q50</b>                                                                                                                            | 1. ہاں | 2. نہیں |           |            |           |  |
| کیا آپ کو خاندانی منصوبہ بندی کی خدمات کی ضرورت ہے؟<br><b>Q51</b>                                                                                           | 1. ہاں | 2. نہیں |           |            |           |  |
| کیا آپ کو کوئی چوٹ ہے جس کا آپ نے پہلے ہی ذکر نہیں کیا ہے؟<br><b>Q52</b>                                                                                    | 1. ہاں | 2. نہیں |           |            |           |  |
| کیا آپ کو صحت کی دائمی پریشانی کی دیکھ بھال کی ضرورت ہے ، (یہ وہ ہے جو طویل عرصے تک چلتا رہتا ہے)؟<br><b>Q53</b>                                            | 1. ہاں | 2. نہیں |           |            |           |  |
| کیا آپ کو کسی ایسی حالت کے لئے سرجری کی ضرورت ہے جس کا پہلے ہی ذکر نہیں کیا گیا ہے؟<br><b>Q54</b>                                                           | 1. ہاں | 2. نہیں |           |            |           |  |
| کیا آپ افسردہ ، پریشان ، یا انتہائی تناؤ کا شکار ہیں؟<br><b>Q55</b>                                                                                         | 1. ہاں | 2. نہیں |           |            |           |  |
| کیا آپ نے پچھلے 12 مہینوں میں مندرجہ ذیل میں سے ایک طبی معائنہ کیا ہے؟<br><b>Q56</b>                                                                        |        |         |           |            |           |  |
| کینسر کی اسکریننگ ، (یا اپنے پاخانہ ، سگمائیڈوسکوپی ، یا کالونوسکوپی میں خون کی جانچ                                                                        | 1. ہاں | 2. نہیں |           |            |           |  |

|                                                                                                                |       |        |  |  |  |  |
|----------------------------------------------------------------------------------------------------------------|-------|--------|--|--|--|--|
| (کریں)                                                                                                         |       |        |  |  |  |  |
| آنکھ میں گلوکوما یا دباؤ کے لئے ٹیسٹ                                                                           | ہاں۔1 | نہیں۔2 |  |  |  |  |
| بلڈ کولیسٹرول ٹیسٹ                                                                                             | ہاں۔1 | نہیں۔2 |  |  |  |  |
| ہائی بلڈ پریشر کی جانچ کریں                                                                                    | ہاں۔1 | نہیں۔2 |  |  |  |  |
| ذیابیطس کا ٹیسٹ                                                                                                | ہاں۔1 | نہیں۔2 |  |  |  |  |
| چھاتی یا پیٹ کا الٹراساؤنڈ                                                                                     | ہاں۔1 | نہیں۔2 |  |  |  |  |
| میموگرام                                                                                                       | ہاں۔1 | نہیں۔2 |  |  |  |  |
| پیپ ٹیسٹ                                                                                                       | ہاں۔1 | نہیں۔2 |  |  |  |  |
| بڈی کثافت ٹیسٹ (اسٹیوپوروسس کے لئے)                                                                            | ہاں۔1 | نہیں۔2 |  |  |  |  |
| حیاتیاتی اسکریننگ ٹیسٹ                                                                                         | ہاں۔1 | نہیں۔2 |  |  |  |  |
| ایچ آئی وی / ایڈز کی اسکریننگ                                                                                  | ہاں۔1 | نہیں۔2 |  |  |  |  |
| جنسی بیماریوں کی اسکریننگ                                                                                      | ہاں۔1 | نہیں۔2 |  |  |  |  |
| دانتوں کا امتحان                                                                                               | ہاں۔1 | نہیں۔2 |  |  |  |  |
| فلو یا نمونیا کے لئے گولی مار دی گئی                                                                           | ہاں۔1 | نہیں۔2 |  |  |  |  |
| حمل کا ٹیسٹ                                                                                                    | ہاں۔1 | نہیں۔2 |  |  |  |  |
| کورونا                                                                                                         | ہاں۔1 | نہیں۔2 |  |  |  |  |
| بانجھ پن کے ٹیسٹ                                                                                               | ہاں۔1 | نہیں۔2 |  |  |  |  |
| ملیریا                                                                                                         | ہاں۔1 | نہیں۔2 |  |  |  |  |
| کوئی اور میڈیکل ٹیسٹ (براہ کرم بتائیں)؟                                                                        |       |        |  |  |  |  |
| <b>پچھلے 12 مہینوں میں ، کیا آپ کے کسی بھی صحت کی دیکھ بھال کرنے والے نے آپ کے بارے میں معلومات فراہم کیں؟</b> |       |        |  |  |  |  |
| <b>Q57</b>                                                                                                     |       |        |  |  |  |  |
| سگریٹ نوشی ، دوسرے ہاتھ کا دھواں ، یا تمباکو نوشی                                                              | ہاں۔1 | نہیں۔2 |  |  |  |  |
| چھوڑنا                                                                                                         |       |        |  |  |  |  |
| خوراک                                                                                                          | ہاں۔1 | نہیں۔2 |  |  |  |  |
| شراب یا منشیات کا استعمال                                                                                      | ہاں۔1 | نہیں۔2 |  |  |  |  |
| جسمانی تندرستی یا ورزش                                                                                         | ہاں۔1 | نہیں۔2 |  |  |  |  |
| سان - پس                                                                                                       | ہاں۔1 | نہیں۔2 |  |  |  |  |
| یا ہارمون کی تبدیلی کی تھراپی                                                                                  |       |        |  |  |  |  |
| حفظان صحت                                                                                                      | ہاں۔1 | نہیں۔2 |  |  |  |  |
| صفائی                                                                                                          | ہاں۔1 | نہیں۔2 |  |  |  |  |
| متعدی بیماریوں سے کیسے بچایا جائے                                                                              | ہاں۔1 | نہیں۔2 |  |  |  |  |
| کام یا مالی پریشانی                                                                                            | ہاں۔1 | نہیں۔2 |  |  |  |  |



|                                                                                                                     |       |        |  |  |                                         |
|---------------------------------------------------------------------------------------------------------------------|-------|--------|--|--|-----------------------------------------|
| خاندانی یا رشتے کے مسائل                                                                                            | ہاں.1 | نہیں.2 |  |  |                                         |
| بچوں کی صحت اور تغذیہ کی اہمیت                                                                                      | ہاں.1 | نہیں.2 |  |  |                                         |
| تناؤ کا انتظام                                                                                                      | ہاں.1 | نہیں.2 |  |  |                                         |
| غیرجانبدار حمل اور پیدائش کے فاصلوں کو روکنا                                                                        | ہاں.1 | نہیں.2 |  |  |                                         |
| متبادل علاج جیسے جڑی بوٹیاں یا ایکویونکچر استعمال کرنا                                                              | ہاں.1 | نہیں.2 |  |  |                                         |
| اسٹیوپوروسس کی روک تھام                                                                                             | ہاں.1 | نہیں.2 |  |  |                                         |
| آپ اور کنبے کے لئے غذائی ضروریات                                                                                    | ہاں.1 | نہیں.2 |  |  |                                         |
| خوراک کی کمی سے بچنے کے طریقے                                                                                       | ہاں.1 | نہیں.2 |  |  |                                         |
| غذائی تحفظ کے لیے خود کفیل ہونے کو بہتر کرنا                                                                        | ہاں.1 | نہیں.2 |  |  |                                         |
| <b>کیا آپ کے پاس غذائی اجزاء ہیں جو آپ نے پچھلے 12 مہینوں میں استعمال کیے ہیں؟</b>                                  |       |        |  |  |                                         |
| <b>Q58</b>                                                                                                          |       |        |  |  |                                         |
| وٹامن سی                                                                                                            | ہاں.1 | نہیں.2 |  |  |                                         |
| وٹامن ڈی                                                                                                            | ہاں.1 | نہیں.2 |  |  |                                         |
| وٹامن ای                                                                                                            | ہاں.1 | نہیں.2 |  |  |                                         |
| بی کمپلیکس                                                                                                          | ہاں.1 | نہیں.2 |  |  |                                         |
| کیلشیم                                                                                                              | ہاں.1 | نہیں.2 |  |  |                                         |
| حمل والی وٹامن                                                                                                      | ہاں.1 | نہیں.2 |  |  |                                         |
| دودھ پلانے والی وٹامن                                                                                               | ہاں.1 | نہیں.2 |  |  |                                         |
| جنرل ملٹی وٹامن                                                                                                     | ہاں.1 | نہیں.2 |  |  |                                         |
| <b>صحت کی خدمات کے لیے ان میں سے آپکی ترجیح کون ہیں؟</b>                                                            |       |        |  |  |                                         |
| <b>Q59</b>                                                                                                          |       |        |  |  |                                         |
| کنبہ (جیسے ماں / ساس / خالہ)                                                                                        | ہاں.1 | نہیں.2 |  |  | اگر ہاں ،<br>تو بیان<br>کریں کہ<br>کون: |
| خواتین کا صحت مرکز جہاں آپ اپنی بنیادی صحت کی دیکھ بھال حاصل کرسکتے ہیں ، بشمول امراض صحت کی دیکھ بھال ، ایک جگہ پر | ہاں.1 | نہیں.2 |  |  |                                         |
| قابل اعتماد برادری کا ممیر                                                                                          | ہاں.1 | نہیں.2 |  |  |                                         |
| نرس یا معاشرتی صحت کی دیکھ بھال کرنے والی                                                                           | ہاں.1 | نہیں.2 |  |  |                                         |
| نرس یا معاشرتی صحت کی دیکھ بھال کرنے والی                                                                           | ہاں.1 | نہیں.2 |  |  |                                         |
| مقامی خواتین                                                                                                        | ہاں.1 | نہیں.2 |  |  |                                         |
| نجی کلینک                                                                                                           | ہاں.1 | نہیں.2 |  |  |                                         |

|                                                                                                                                               |        |           |         |           |                  |  |
|-----------------------------------------------------------------------------------------------------------------------------------------------|--------|-----------|---------|-----------|------------------|--|
| عام طور پر ، آپ کو معاشرتی صحت سے متعلق اپنی پریشانیوں کے بارے میں معاشرتی صحت کی دیکھ بھال کرنے والے سے بات کرنا کتنا مشکل ہے؟<br><b>Q60</b> | بر وقت | بیشتر وقت | کچھ وقت | تھوڑا وقت | کسی بھی وقت نہیں |  |
| براہ کرم کمیونٹی کی صحت کی دیکھ بھال فراہم کرنے والی خدمات کی درجہ بندی کریں جیسا کہ آپ نے ماضی میں تجربہ کیا ہے۔                             |        |           |         |           |                  |  |
| کیا آپکی بات غور سے سنی جاتی ہے؟<br><b>Q61</b>                                                                                                | بر وقت | بیشتر وقت | کچھ وقت | تھوڑا وقت | کسی بھی وقت نہیں |  |
| آپ سے احترام اور خیال رکھنے والے انداز میں گفتگو کرنا<br><b>Q62</b>                                                                           | بر وقت | بیشتر وقت | کچھ وقت | تھوڑا وقت | کسی بھی وقت نہیں |  |
| ایسی زبان یا بولی میں آپ سے بات کرنا جو آپکو اچھی طرح سمجھ میں آتی ہو<br><b>Q63</b>                                                           | بر وقت | بیشتر وقت | کچھ وقت | تھوڑا وقت | کسی بھی وقت نہیں |  |
| آپ کے سوالوں کا واضح جواب دینا<br><b>Q64</b>                                                                                                  | بر وقت | بیشتر وقت | کچھ وقت | تھوڑا وقت | کسی بھی وقت نہیں |  |
| آپ کو اپنے سب سوالات پوچھنے کا موقع فراہم کرنا<br><b>Q65</b>                                                                                  | بر وقت | بیشتر وقت | کچھ وقت | تھوڑا وقت | کسی بھی وقت نہیں |  |
| آپ کو اپنی ذاتی یا حساس صحت سے متعلق پریشانیوں کے بارے میں بات کرنے میں آسانی محسوس کرنے میں مدد دینا<br><b>Q66</b>                           | بر وقت | بیشتر وقت | کچھ وقت | تھوڑا وقت | کسی بھی وقت نہیں |  |
| آپ کو صحت سے متعلق مکمل معلومات دینا<br><b>Q67</b>                                                                                            | بر وقت | بیشتر وقت | کچھ وقت | تھوڑا وقت | کسی بھی وقت نہیں |  |
| متبادل علاج ، غذا اور طرز زندگی پر تبادلہ خیال کرنا<br><b>Q68</b>                                                                             | بر وقت | بیشتر وقت | کچھ وقت | تھوڑا وقت | کسی بھی وقت نہیں |  |
| کسی بھی ٹیسٹ یا خدمات کے بارے میں آپ کو مکمل معلومات دینا<br><b>Q69</b>                                                                       | بر وقت | بیشتر وقت | کچھ وقت | تھوڑا وقت | کسی بھی وقت نہیں |  |
| آپ کو اپنے ٹیسٹ کے نتائج دینا<br><b>Q70</b>                                                                                                   | بر وقت | بیشتر وقت | کچھ وقت | تھوڑا وقت | کسی بھی وقت نہیں |  |

|                                                                                                                                    |        |           |         |           |                  |  |
|------------------------------------------------------------------------------------------------------------------------------------|--------|-----------|---------|-----------|------------------|--|
| کیا علاج کے امور آپ کو مکمل معلومات فراہم کرتے ہیں؟<br><b>Q71</b>                                                                  | بر وقت | بیشتر وقت | کچھ وقت | تھوڑا وقت | کسی بھی وقت نہیں |  |
| آپ کو اپنی صحت کی دیکھ بھال کے بارے میں اہم فیصلے کرنے کا موقع فراہم کرنا<br><b>Q72</b>                                            | بر وقت | بیشتر وقت | کچھ وقت | تھوڑا وقت | کسی بھی وقت نہیں |  |
| جب آپ کو ضرورت ہو تو آپ کو تحریری ، طباعت یا ڈیجیٹل معلومات فراہم کرنا.<br><b>Q73</b>                                              | بر وقت | بیشتر وقت | کچھ وقت | تھوڑا وقت | کسی بھی وقت نہیں |  |
| پنے دوروں کے دوران آپ کے ساتھ کافی وقت گزارنا<br><b>Q74</b>                                                                        | بر وقت | بیشتر وقت | کچھ وقت | تھوڑا وقت | کسی بھی وقت نہیں |  |
| اپنی صحت کی دیکھ بھال کے ساتھ کی طرح سلوک کرنا<br><b>Q75</b>                                                                       | بر وقت | بیشتر وقت | کچھ وقت | تھوڑا وقت | کسی بھی وقت نہیں |  |
| صحت کے فیصلے کرنے کے لئے آپ کس پر انحصار کرتے ہیں وہ بنیادی / اہم وسائل کون سے ہیں؟ (متعلقہ اختیارات پر نشان لگائیں)<br><b>Q76</b> |        |           |         |           |                  |  |
| شوہر                                                                                                                               |        |           |         |           |                  |  |
| ساس                                                                                                                                |        |           |         |           |                  |  |
| دوسرے سسرال والے                                                                                                                   |        |           |         |           |                  |  |
| کنہ (والدین ، بہن بھائی ، بچے...)                                                                                                  |        |           |         |           |                  |  |
| اخبارات / رسالے                                                                                                                    |        |           |         |           |                  |  |
| صحت نیوز لیٹر                                                                                                                      |        |           |         |           |                  |  |
| ٹی وی                                                                                                                              |        |           |         |           |                  |  |
| ریڈیو                                                                                                                              |        |           |         |           |                  |  |
| انٹرنیٹ                                                                                                                            |        |           |         |           |                  |  |
| موبائل خدمات                                                                                                                       |        |           |         |           |                  |  |
| خاندانی دوست                                                                                                                       |        |           |         |           |                  |  |
| برادری                                                                                                                             |        |           |         |           |                  |  |
| میڈیکل پریکٹیشنر                                                                                                                   |        |           |         |           |                  |  |
| مقامی علاج                                                                                                                         |        |           |         |           |                  |  |
| مقامی امام / مذہبی رہنما                                                                                                           |        |           |         |           |                  |  |
| دیگر (برائے مہربانی فہرست دیں)                                                                                                     |        |           |         |           |                  |  |
| <b>صحت کے موجودہ خطرات</b>                                                                                                         |        |           |         |           |                  |  |
| تم فی الحال تمباکو نوشی کرتے ہو؟                                                                                                   | 1. ہاں | 2. نہیں   |         |           |                  |  |

|                                                                                                 |        |           |                         |           |                  |  |
|-------------------------------------------------------------------------------------------------|--------|-----------|-------------------------|-----------|------------------|--|
| <b>Q77</b>                                                                                      |        |           |                         |           |                  |  |
| جب آپ / بچے ایک ہی کمرے میں ہوتے ہیں تو کیا کوئی اور گھر میں تمباکو نوشی کرتا ہے؟<br><b>Q78</b> | ہاں 1. | نہیں 2.   | اگر ہاں ، تو یہ کون ہے: |           |                  |  |
| کیا آپ پریشان ، دباؤ ، افسردہ ، خودکشی محسوس کرتے ہیں؟<br><b>Q79</b>                            | ہاں 1. | نہیں 2.   | اگر ہاں ، تو کون سی:    |           |                  |  |
| کیا آپ کوئی بھی دوائی لیتے ہیں (اپنے آپ کو تناؤ یا بیماری سے نجات کے لئے)؟<br><b>Q80</b>        | ہاں 1. | نہیں 2.   | اگر ہاں ، تو کون سی:    |           |                  |  |
| کیا آپ کو کسی بھی معذوری کا سامنا ہے؟                                                           |        |           |                         |           |                  |  |
| کیا آپکی معذوری آپکو کننے کی مکمل دیکھ بھال سے روکتی ہے؟<br><b>Q81</b>                          | ہر وقت | بیشتر وقت | کچھ وقت                 | تھوڑا وقت | کسی بھی وقت نہیں |  |
| کیا آپکی معذوری آپکو زندگی مکمل طور پر جاری رکھنے سے روکتی ہے؟<br><b>Q82</b>                    | ہر وقت | بیشتر وقت | کچھ وقت                 | تھوڑا وقت | کسی بھی وقت نہیں |  |

|                                                                                                                            |        |           |         |           |                  |  |
|----------------------------------------------------------------------------------------------------------------------------|--------|-----------|---------|-----------|------------------|--|
| <b>سیکشن ڈی:</b>                                                                                                           |        |           |         |           |                  |  |
| <b>بیس لائن-غذائیت اور خوراک کی حفاظت کا سرویس یونیسف</b>                                                                  |        |           |         |           |                  |  |
| پچھلے 6 مہینوں میں ، آپ کو اپنے کننے کو کھانا کھلانا کرنے کے لئے درکار کھانے کی خریداری کرنا اتنا مہنگا لگا؟<br><b>Q83</b> | ہر وقت | بیشتر وقت | کچھ وقت | تھوڑا وقت | کسی بھی وقت نہیں |  |
| کیا آپ کو پھل خریدنا بہت مہنگا لگا؟<br><b>Q84</b>                                                                          | ہر وقت | بیشتر وقت | کچھ وقت | تھوڑا وقت | کسی بھی وقت نہیں |  |
| کیا آپ کو سبزی خریدنا بہت مہنگا لگا؟<br><b>Q85</b>                                                                         | ہر وقت | بیشتر وقت | کچھ وقت | تھوڑا وقت | کسی بھی وقت نہیں |  |
| کیا آپ کو گوشت خریدنا بہت مہنگا لگا؟<br><b>Q86</b>                                                                         | ہر وقت | بیشتر وقت | کچھ وقت | تھوڑا وقت | کسی بھی وقت نہیں |  |
| کیا آپ کو انڈے خریدنا بہت مہنگا لگا؟                                                                                       | ہر وقت | بیشتر وقت | کچھ وقت | تھوڑا وقت | کسی بھی وقت نہیں |  |

|                                                                                                                        |        |           |         |           |                  |  |
|------------------------------------------------------------------------------------------------------------------------|--------|-----------|---------|-----------|------------------|--|
| <b>Q87</b>                                                                                                             |        |           |         | وقت       | وقت نہیں         |  |
| کیا آپ کو دودھ خریدنا بہت مہنگا لگا؟<br><b>Q88</b>                                                                     | ہر وقت | بیشتر وقت | کچھ وقت | تھوڑا وقت | کسی بھی وقت نہیں |  |
| کیا آپ کو روٹی خریدنا بہت مہنگا لگا؟<br><b>Q89</b>                                                                     | ہر وقت | بیشتر وقت | کچھ وقت | تھوڑا وقت | کسی بھی وقت نہیں |  |
| کیا پچھلے 3 مہینے مہنگائی کی وجہ سے کھانا نہ خریدنے کا خدشہ پیدا ہوا؟<br><b>Q90</b>                                    | ہر وقت | بیشتر وقت | کچھ وقت | تھوڑا وقت | کسی بھی وقت نہیں |  |
| پچھلے 3 مہینوں میں ، مہنگائی کی وجہ سے کبھی گھر پر کھانا ختم ہوا؟<br><b>Q91</b>                                        | ہر وقت | بیشتر وقت | کچھ وقت | تھوڑا وقت | کسی بھی وقت نہیں |  |
| پچھلے 3 مہینوں میں ، کیا آپ یا کسی اور نے خوراک کی کمی کی وجہ سے نہیں کھایا؟<br><b>Q92</b>                             | ہر وقت | بیشتر وقت | کچھ وقت | تھوڑا وقت | کسی بھی وقت نہیں |  |
| پچھلے 3 مہینوں میں ، کیا آپ نے کبھی ایسا محسوس کیا ہے کہ آپ کے بچے بھوکے ہیں کیونکہ کھانا کافی نہیں تھا؟<br><b>Q93</b> | ہر وقت | بیشتر وقت | کچھ وقت | تھوڑا وقت | کسی بھی وقت نہیں |  |
| کیا آپ کے بچے 3 ماہ بھوکے سوئے؟<br><b>Q94</b>                                                                          | ہر وقت | بیشتر وقت | کچھ وقت | تھوڑا وقت | کسی بھی وقت نہیں |  |
